# Supplementary material
Source: Preprints.org preprint supplement (doi:10.20944/preprints202011.0059.v1)
Supplement: Supplementary file 1 [file supplementary]

**Inactivation of three RG(S/T)GR pentapeptide-containing negative regulators of HetR results in lethal differentiation of *Anabaena* PCC 7120**

**Supplemental Figures**

Supplemental Figure 1: Construction of pRIAM929 and pRIAM931 ( $\Delta patX$ )

Supplemental Figure 2: Construction of pRIAM1177 ( $\Delta patS$ )

Supplemental Figure 3: Segregation of mutations

Supplemental Figure 4: Differentiation of mutant strains

# Supplemental Figure S1. Construction of pRIAM929 and pRIAM931 ( $\Delta patX$ )

## A. Insertional inactivation of *patX*

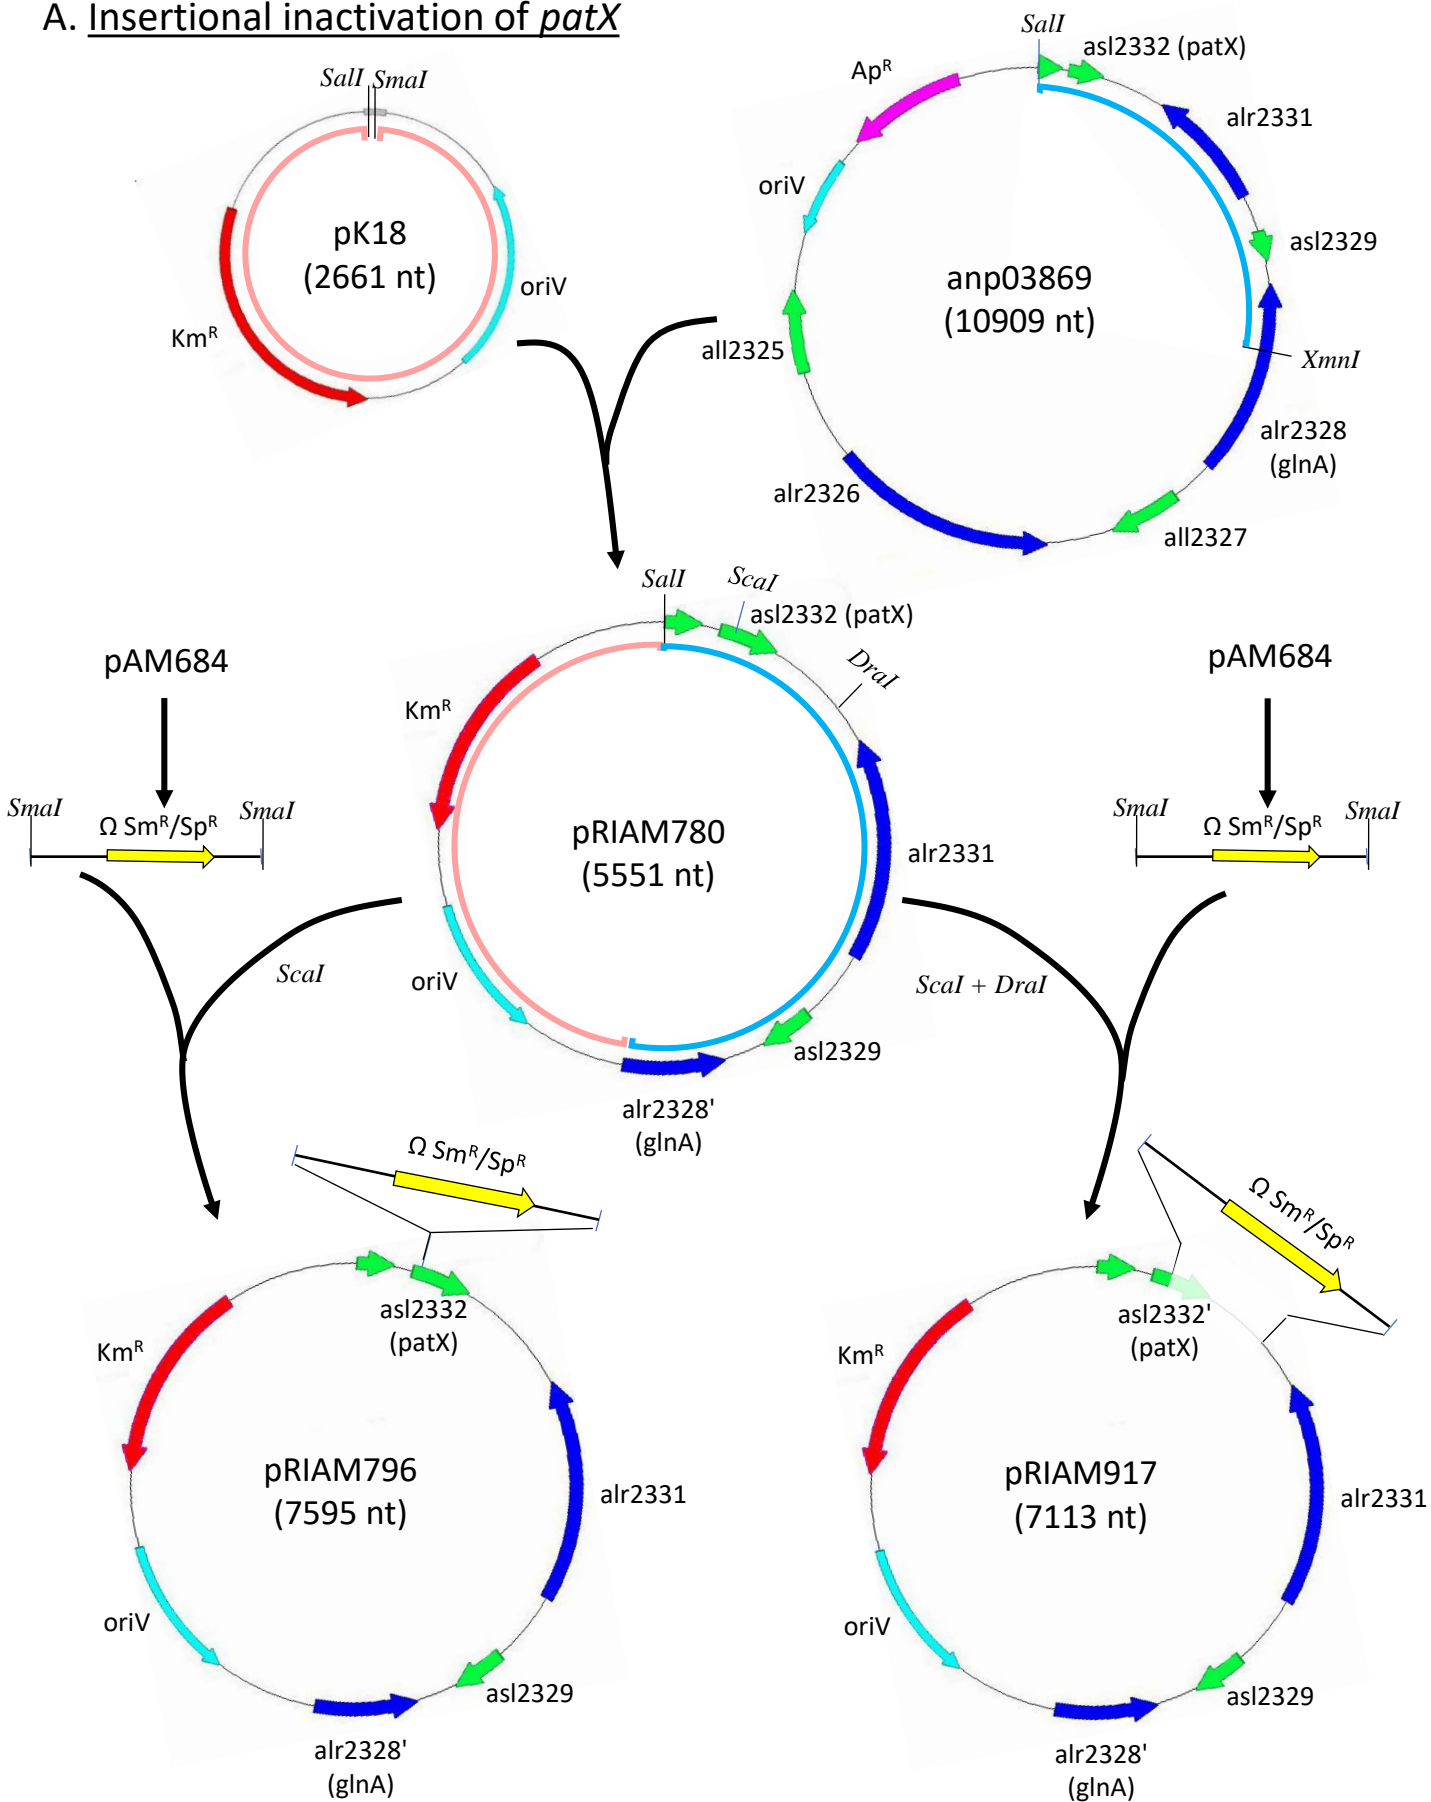

## B. Reconstruction of 5' flanking region

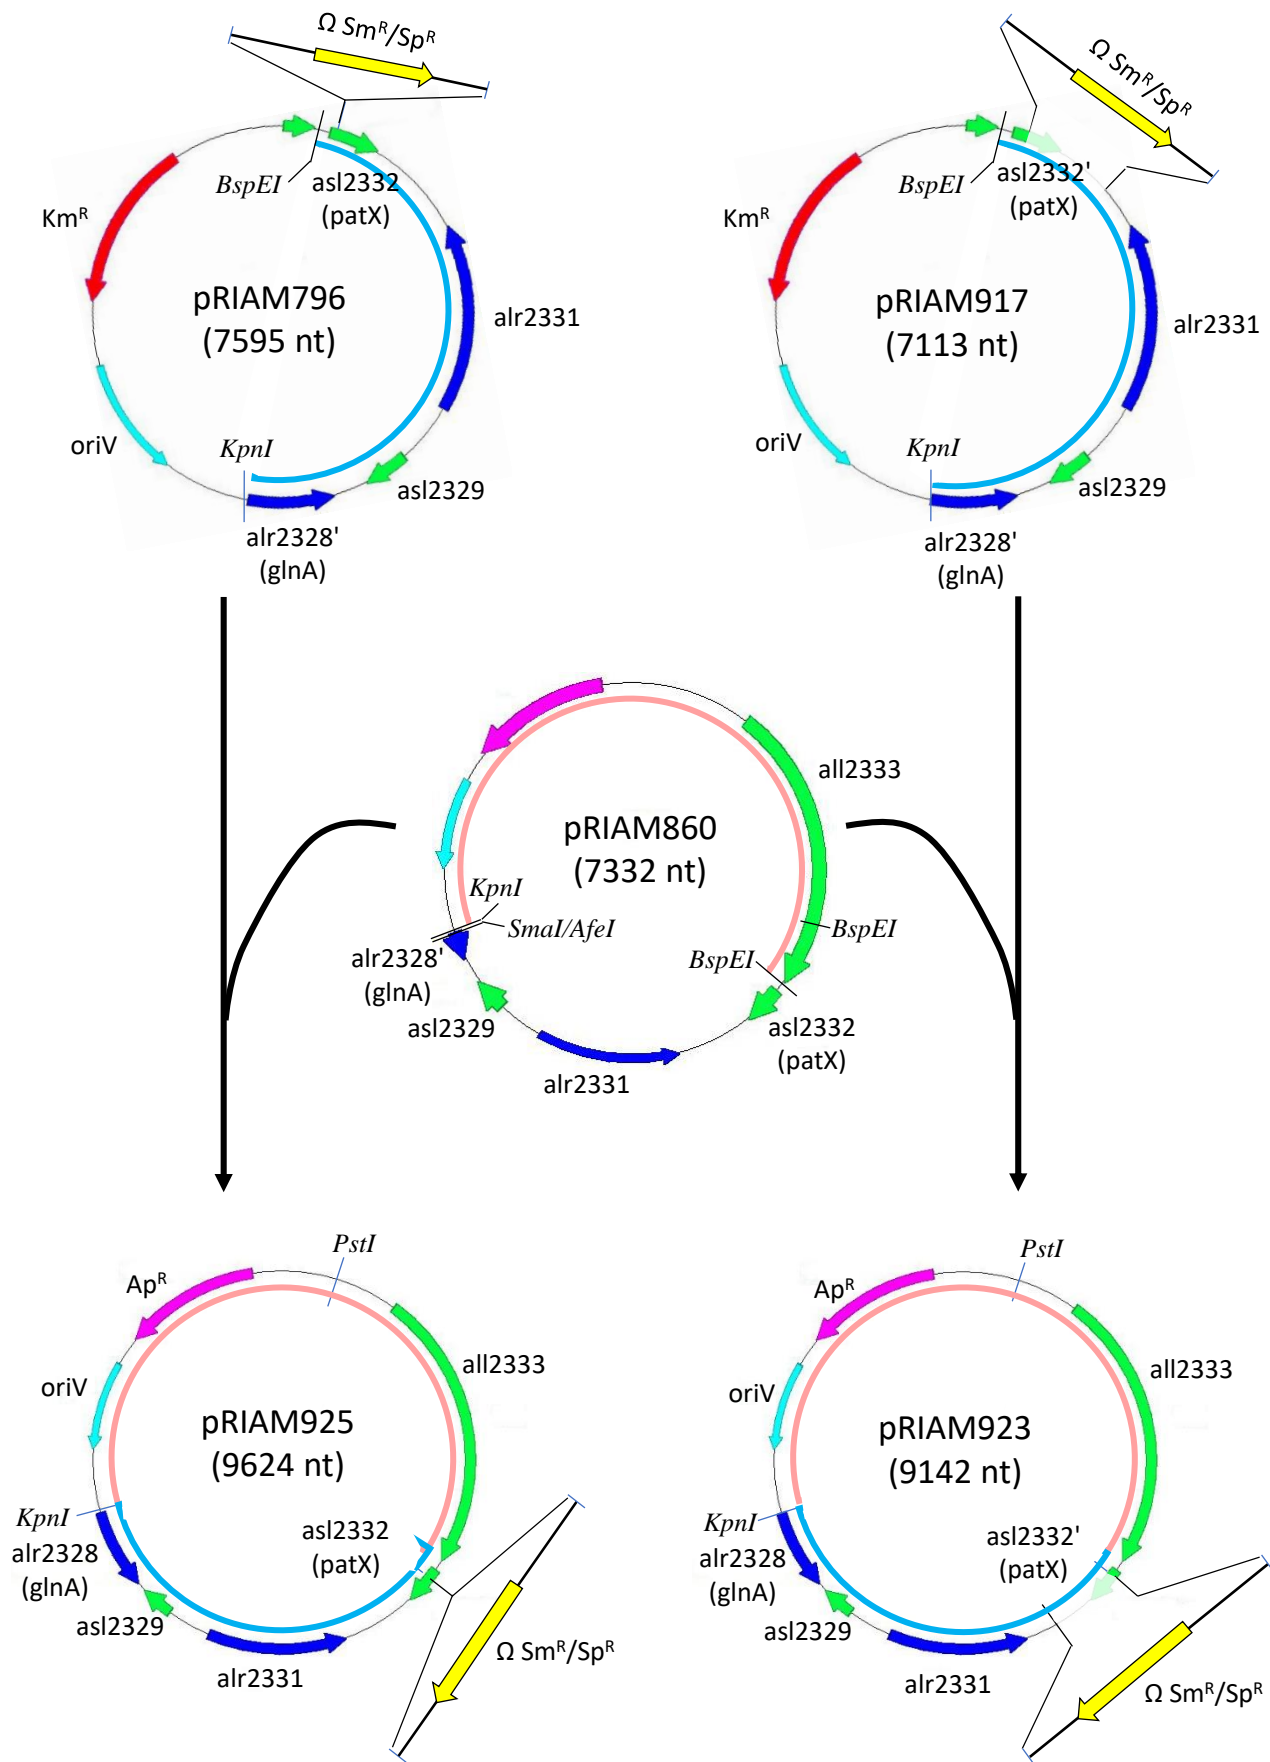

### C. Transfer of construct to suicide vector

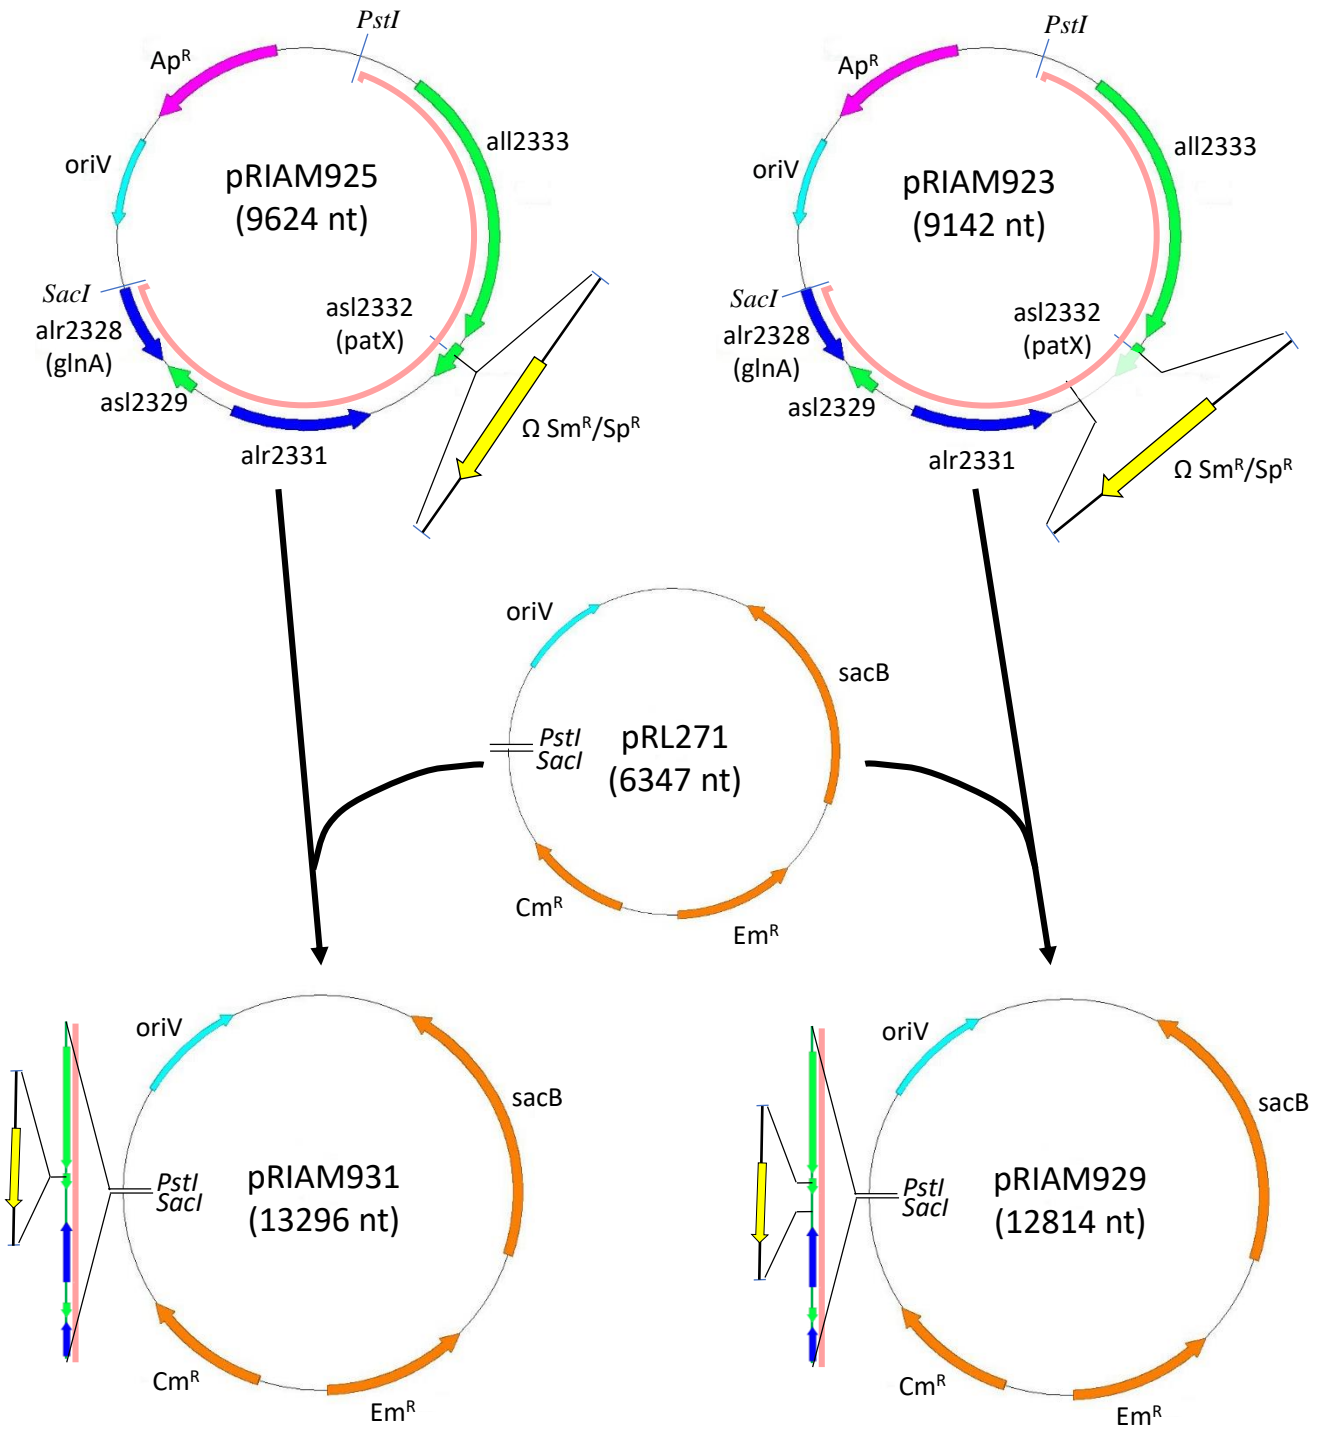

# Supplemental Figure S2. Construction of pRIAM1177 ( $\Delta patS$ )

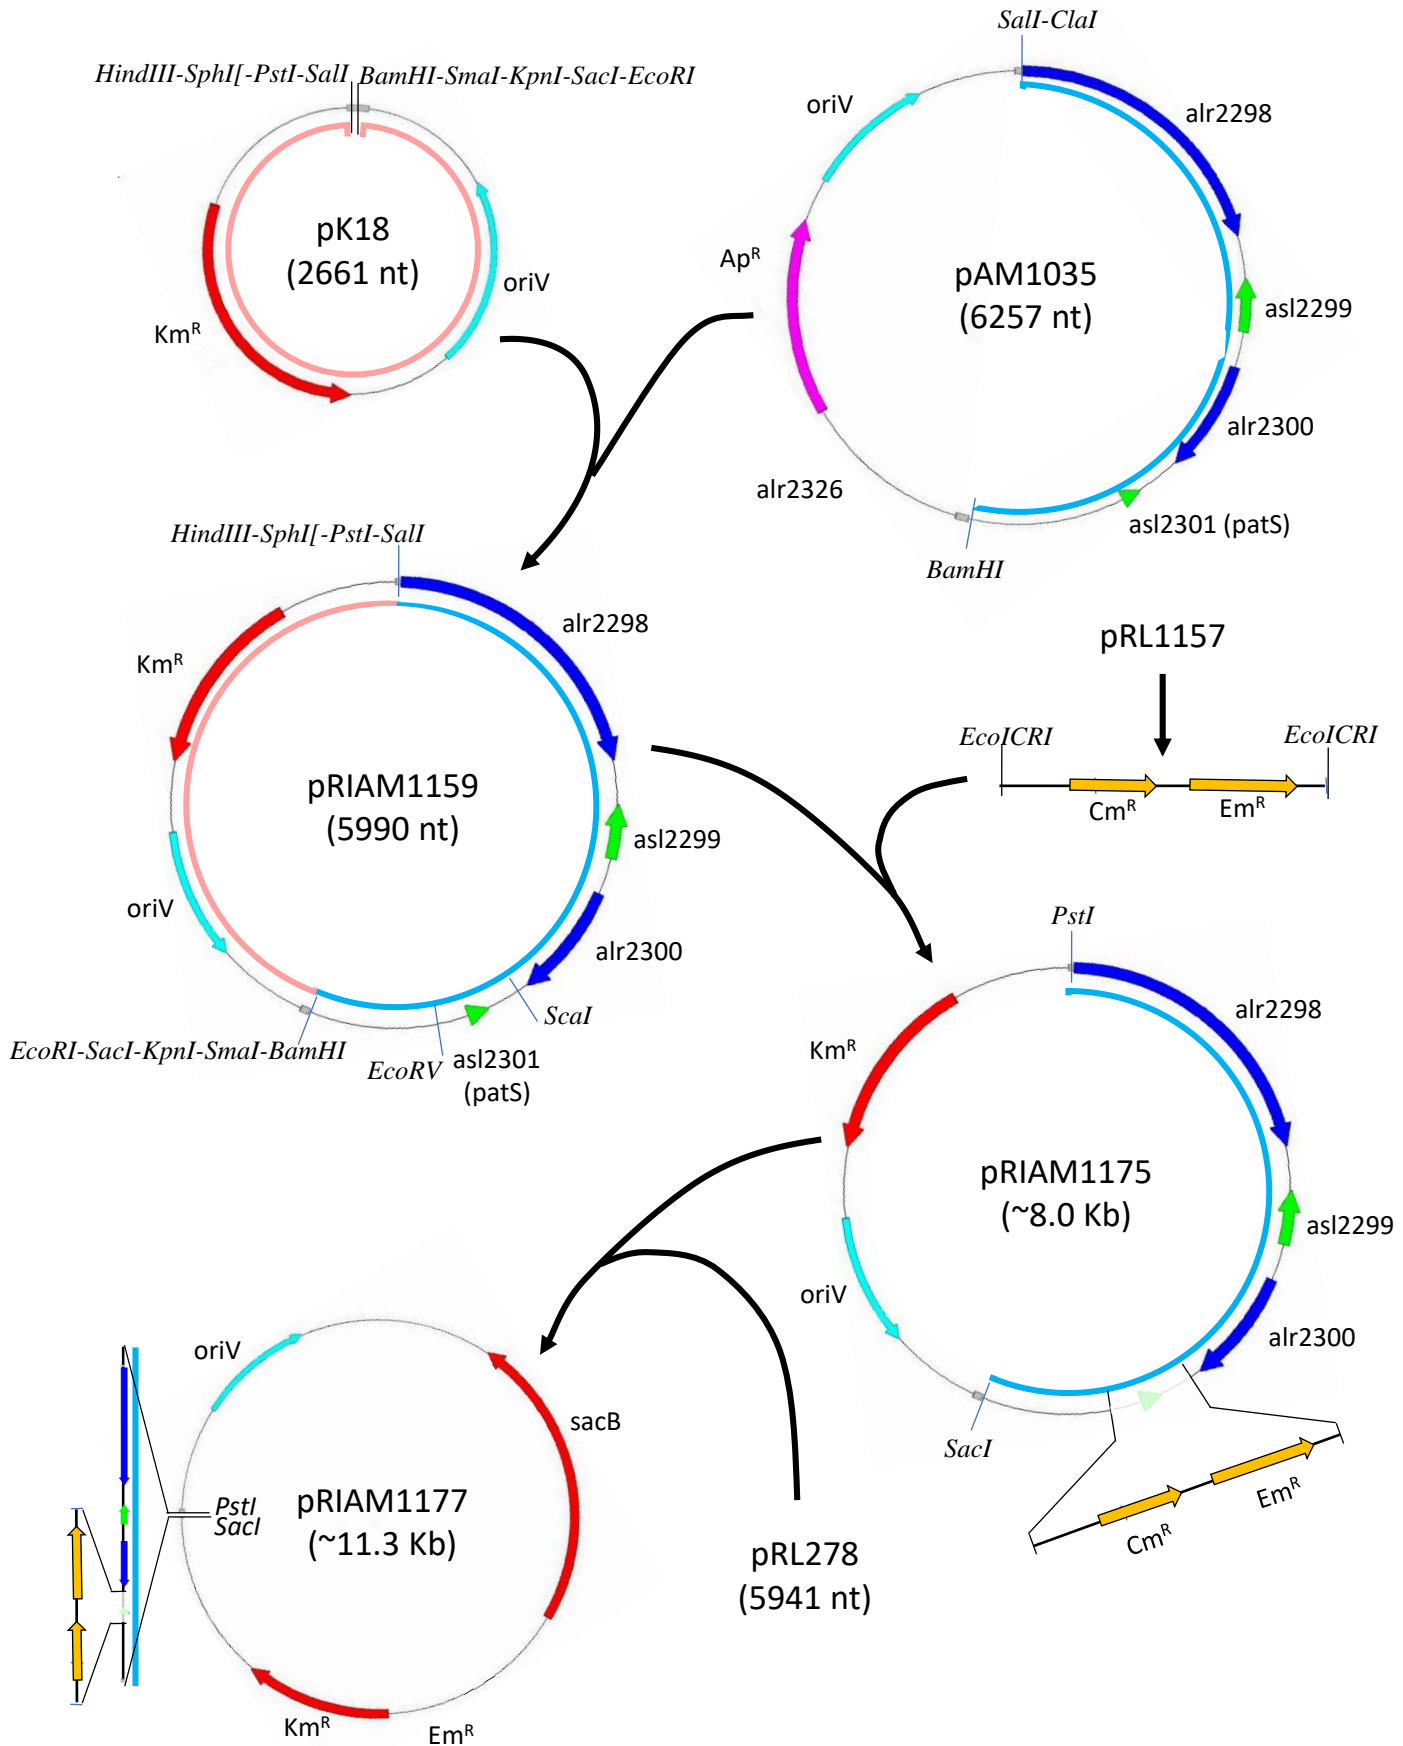

### Supplemental Figure S3. Segregation of mutations

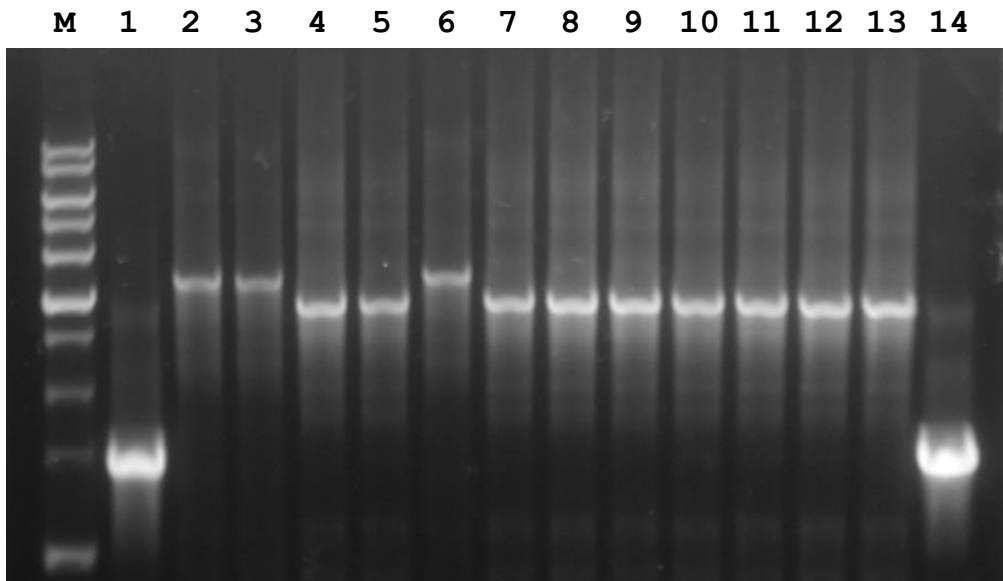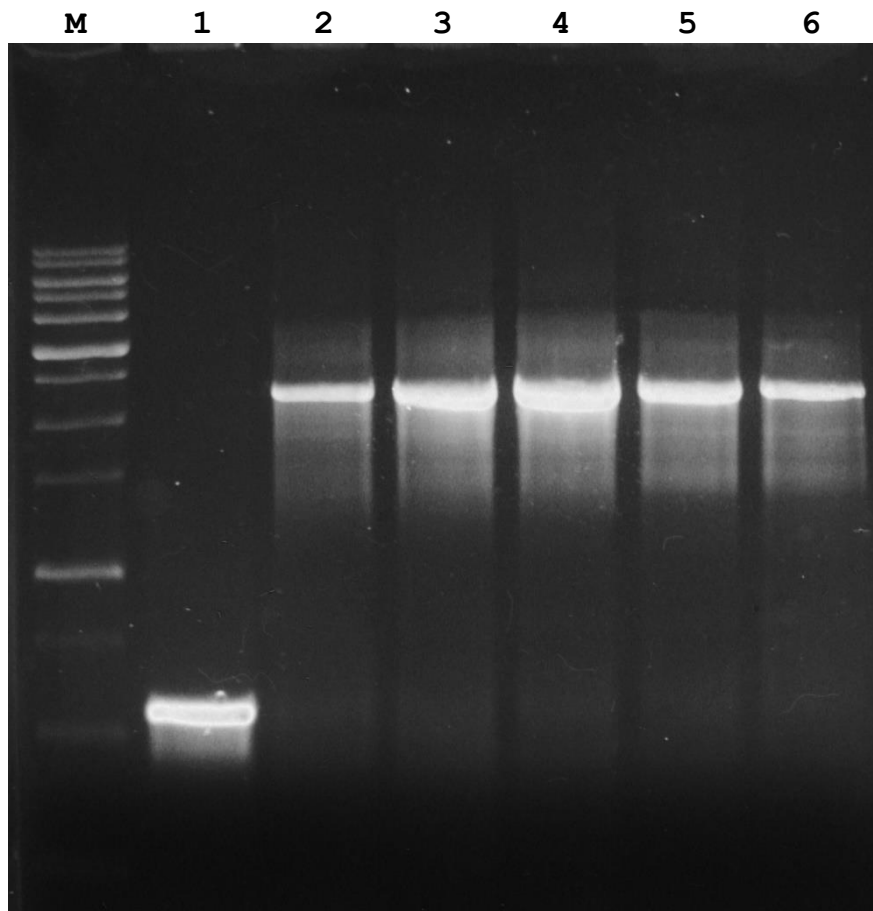

(top) **Segregation of *patX* mutations in constructed *patX* mutant strains.**

Primers 2332-F2 TATTGACACCATGCACACTT and 2331-F1

TCTCAGATGGAGCTCGTCATGCC were used for PCR using chromosomal DNAs from the following strains:

- M** molecular markers (1kb: 10, 8, 6, 5, 4, **3**, 2.5, 2, 1.5, **1**)
- 1** wild type *Anabaena* PCC 7120
- 2,3** different clones of RIAM1238, *patX*:: $\Omega$
- 4,5** different clones of RIAM1239,  $\Delta$ *patX*:: $\Omega$
- 6** RIAM1241,  $P_{petE-hetN}$  *patX*:: $\Omega$
- 7** RIAM1242,  $P_{petE-hetN}$   $\Delta$ *patX*:: $\Omega$
- 8,9** different clones of RIAM1243,  $\Delta$ *patS*  $\Delta$ *patX*:: $\Omega$ (pAM1714)
- 10,11** different clones of RIAM1245,  $P_{petE-hetN}$  *patX*:: $\Omega$   $\Delta$ *patS*::C.CE3
- 13,14** different clones of RIAM1248,  $P_{petE-hetN}$   $\Delta$ *patX*:: $\Omega$   $\Delta$ *patS*::C.CE3
- 15** wild type *Anabaena* PCC 7120

(bottom) **Segregation of *patS* mutations in constructed *patS* mutant strains.**

Primers 2299-F1 GTCTGCTGTAAGCCTTATCAGC and 2299-R1

CACCATTC AATTGCACCATC were used for PCR using chromosomal DNAs from the following strains:

- M** molecular markers (1kb: 10, 8, 6, 5, 4, **3**, 2.5, 2, 1.5, **1**, 0.75, 0.5, 0.25)
- 1** wild type *Anabaena* PCC 7120
- 3** RIAM1245,  $P_{petE-hetN}$  *patX*:: $\Omega$   $\Delta$ *patS*::C.CE3
- 3,4** different clones of RIAM1248,  $P_{petE-hetN}$   $\Delta$ *patX*:: $\Omega$   $\Delta$ *patS*::C.CE3
- 5,6** RIAM1249 and RIAM1250, different clones of  $P_{petE-hetN}$   $\Delta$ *patS*::C.CE3

## Supplemental Figure S4. Differentiation of mutant strains

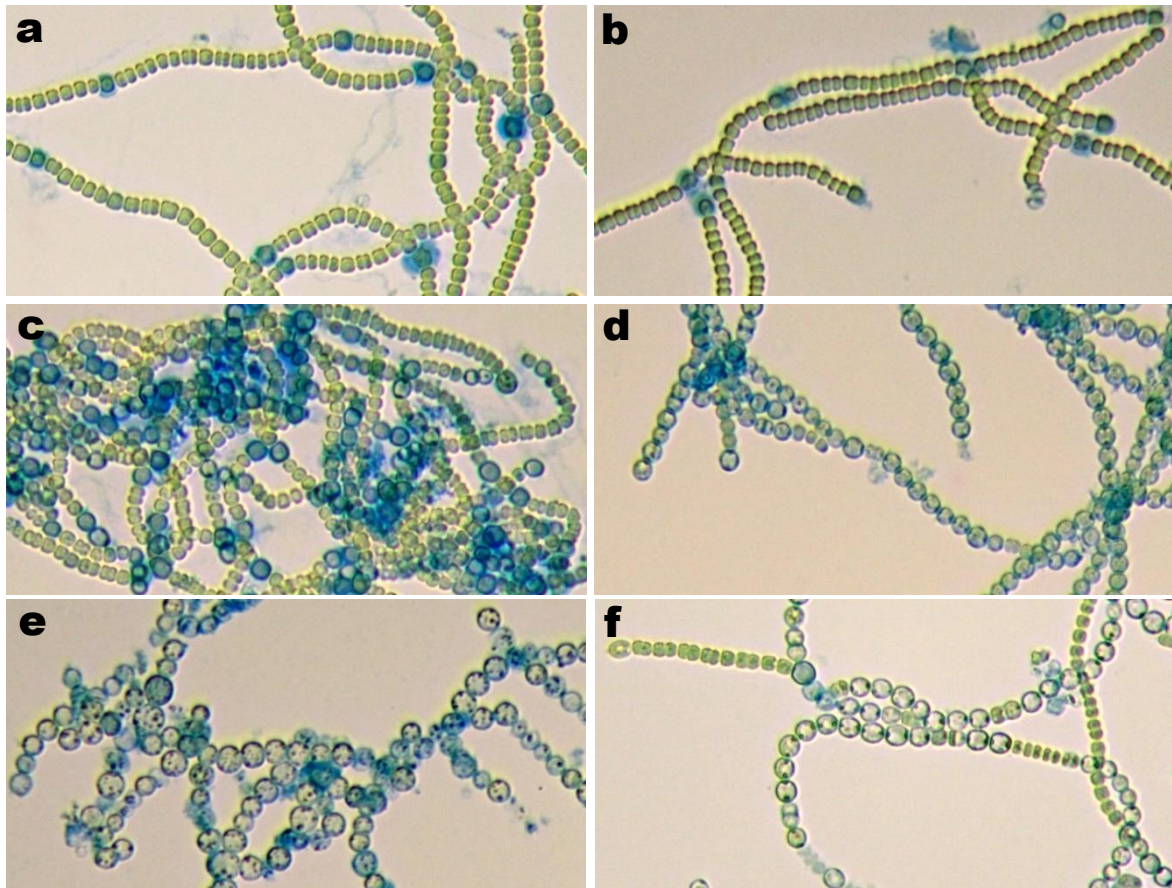

Alcian blue staining of mutant strains PN (a), RIAM1242 (b), RIAM1250 (c), RIAM1248 (d), RIAM1243 (e), and RIAM1250 (f). Figures (a-d), strains 1 day after transfer to copper-free nitrogen-free BG-11<sub>0</sub> medium; (e) RIAM1243 3 days after transfer in copper-free nitrogen-replete BG-11 medium; (f) RIAM1250 3 days after transfer to copper-free, nitrogen-free BG-11<sub>0</sub> medium from a selective BG-11 Sp Sm Em plate (after several transfers on that medium). Segments of vegetative cells in filaments of differentiated heterocysts start to appear.
